# Supplementary material for: Development and validation of an interpretable model for predicting sepsis mortality across care settings
Source: PubMed Central journal article supplement (PMC11176384; doi:10.1038/s41598-024-64463-0), 2024-06-13
Supplement: 41598_2024_64463_MOESM1_ESM.pdf [file 41598_2024_64463_MOESM1_ESM.pdf]

**Table S1. Initial vital signs and laboratory findings at time zero in the derivation dataset.**

| Variables                   | Total<br>(N=7,436) | Survivor<br>(N=4,688) | Non-survivor<br>(N=2,748) |
|-----------------------------|--------------------|-----------------------|---------------------------|
| Initial vital signs         |                    |                       |                           |
| Systolic blood pressure     | 96±29              | 97±29                 | 95±29                     |
| Diastolic blood pressure    | 58±18              | 58±17                 | 57±18                     |
| Heart rate                  | 107±26             | 107±25                | 109±26                    |
| Respiratory rate            | 24±5               | 24±5                  | 25±5                      |
| Body temperature            | 37.3±1.3           | 37.5±1.3              | 37.0±1.2                  |
| Initial laboratory findings |                    |                       |                           |
| WBC                         | 12.9±12            | 12.6±10.3             | 13.3±14.4                 |
| Hb                          | 10.5±2.5           | 10.7±2.5              | 10.2±2.6                  |
| Platelet                    | 176±123            | 182±120               | 165±127                   |
| BUN                         | 40±29              | 36±27                 | 46±31                     |
| Creatinine                  | 1.9±1.8            | 1.8±1.7               | 2.1±1.8                   |
| AST                         | 129±559            | 92±274                | 192±843                   |
| ALT                         | 68±217             | 59±190                | 82±256                    |
| Bilirubin                   | 2.0±3.8            | 1.7±3.0               | 2.6±4.8                   |
| Albumin                     | 2.9±0.7            | 3.0±0.7               | 2.7±0.7                   |
| INR                         | 1.5±1.0            | 1.4±0.8               | 1.6±1.2                   |
| CRP                         | 12.9±10.7          | 12.2±10.5             | 14.3±10.9                 |
| Lactate (mmol/L)            | 4.1±3.5            | 3.3±2.8               | 5.3±4.2                   |

Abbreviations: WBC, white blood cell; Hb, hemoglobin; BUN, blood urea nitrogen; AST, aspartate aminotransferase; ALT, alanine aminotransferase; INR, international normalized ratio; CRP, C-reactive protein.

Data are presented as means ± standard deviations.

**Table S2. Predictors of 28-day mortality after sepsis diagnosis using logistic regression analysis with the derivation dataset**

| Risk factors                           | Estimated Coefficient | Standard Error | Odds ratio | 95% CI      | P value |
|----------------------------------------|-----------------------|----------------|------------|-------------|---------|
| Age                                    | 0.016                 | 0.002          | 1.02       | 1.011–1.021 | ,<0.001 |
| Clinical frailty scale (1–3 points)    |                       |                | Reference  |             |         |
| 4–5 points                             | 0.540                 | 0.089          | 1.72       | 1.442–2.041 | <0.001  |
| 6–9 points                             | 0.877                 | 0.079          | 2.40       | 2.057–2.807 | <0.001  |
| Presence of malignancy                 | 0.834                 | 0.063          | 2.30       | 2.036–2.602 | <0.001  |
| SOFA score                             | 0.105                 | 0.010          | 1.11       | 1.088–1.133 | <0.001  |
| Sepsis caused by respiratory infection | 0.688                 | 0.061          | 1.99       | 1.765–2.242 | <0.001  |
| CRRT use                               | 0.811                 | 0.082          | 2.25       | 1.914–2.642 | <0.001  |
| Body temperature (>38°C, BT)           |                       |                | Reference  |             | <0.001  |
| 36°C ≤ BT ≤ 38°C                       | 0.462                 | 0.070          | 1.59       | 1.383–1.820 | <0.001  |
| <36°C                                  | 0.892                 | 0.107          | 2.44       | 1.978–3.009 | <0.001  |
| Albumin (≥3.5 g/dL)                    |                       |                | Reference  |             |         |
| 2.5 g/dL ≤ albumin <3.5 g/dL           | 0.423                 | 0.085          | 1.53       | 1.291–1.804 | <0.001  |
| <2.5 g/dL                              | 0.864                 | 0.097          | 2.37       | 1.963–2.867 | <0.001  |

|                                |       |       |      |             |        |
|--------------------------------|-------|-------|------|-------------|--------|
| INR (>1.3)                     | 0.326 | 0.062 | 1.39 | 1.227–1.563 | <0.001 |
| CRP (mg/dL)                    | 0.010 | 0.003 | 1.01 | 1.005–1.016 | <0.001 |
| Lactic acid ( $\geq 4$ mmol/L) | 0.787 | 0.062 | 2.20 | 1.946–2.478 | <0.001 |

---

Abbreviations: SOFA, Sequential Organ Failure Assessment; CRRT, continuous renal replacement therapy; BT, body temperature; INR, International normalized ratio; CRP, C-reactive protein.

**Table S3. Evaluating Model Performance via Area Under the ROC Curve, Calibration Plots, Hosmer-Lemeshow Test, and Brier Score in the Derivation Dataset**

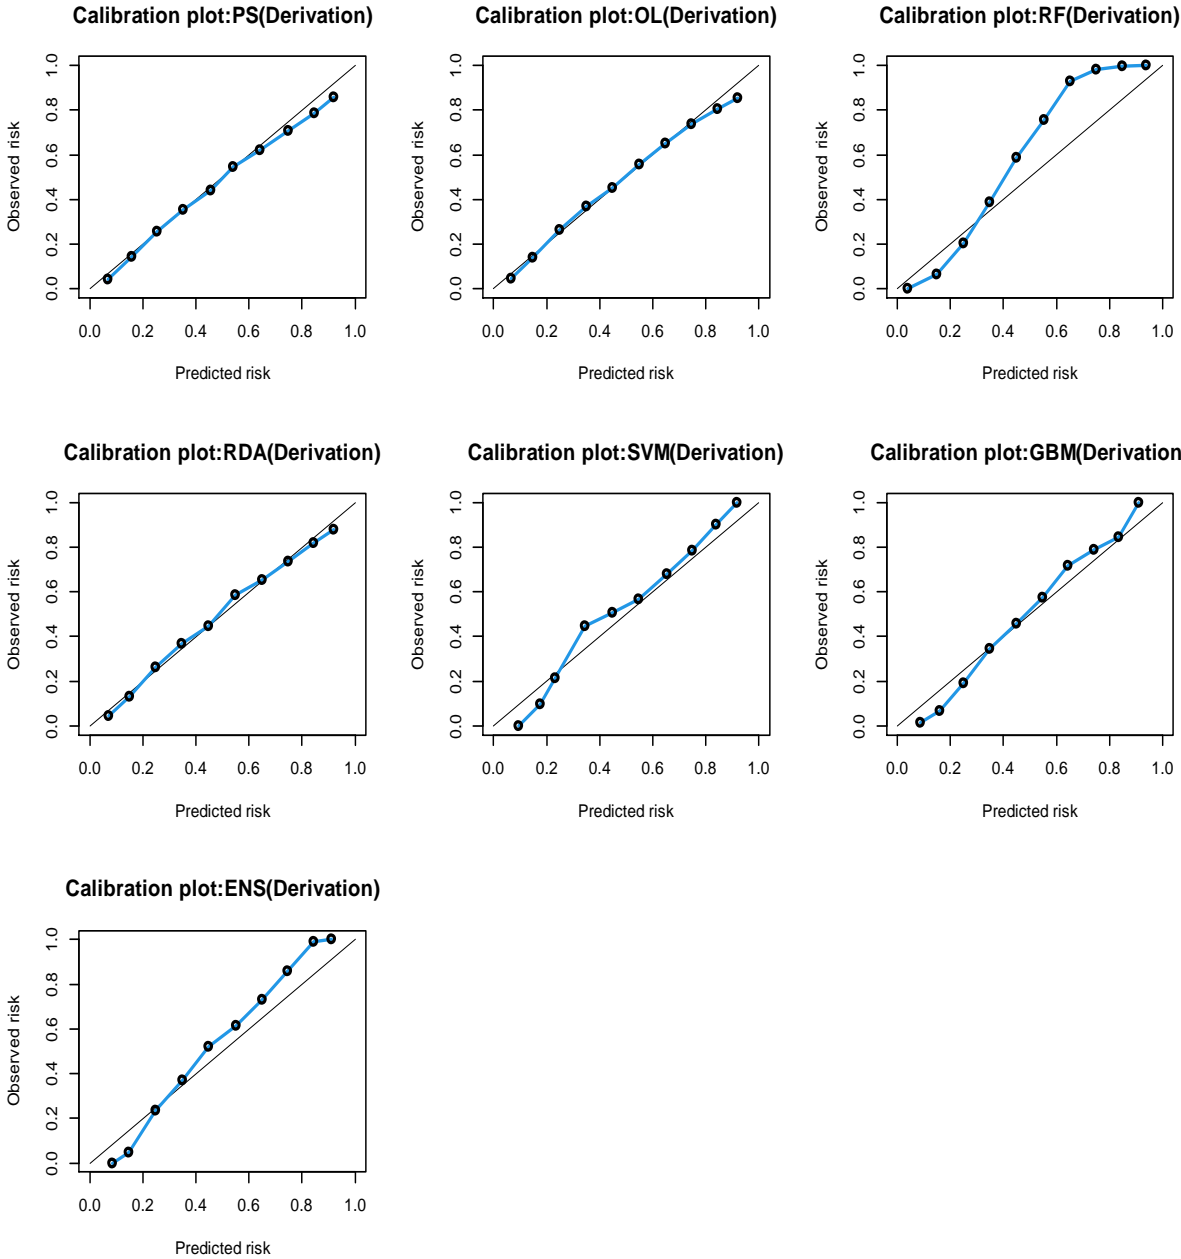

| Method | AUC    | 95% confidence interval | Hosmer-Lemeshow test | Brier Score |
|--------|--------|-------------------------|----------------------|-------------|
| PS     | 0.7743 | 0.763–0.785             | 28.8                 | 0.184       |
| OL     | 0.7787 | 0.768–0.790             | 15.2                 | 0.182       |
| RF     | 0.9632 | 0.959–0.967             | 613.7                | 0.090       |
| RDA    | 0.7780 | 0.767–0.789             | 19.0                 | 0.181       |
| SVM    | 0.8196 | 0.809–0.830             | 122.5                | 0.168       |
| GBM    | 0.7718 | 0.760–0.783             | 109.3                | 0.187       |
| ENS    | 0.8545 | 0.846–0.863             | 268.8                | 0.155       |

Abbreviations: PS, point system; OL, ordinary logistic regression; RF, random forest; RDA, regularized discriminant analysis; SVM, support vector machine; GBM, gradient-boosting machine; ENS, ensemble method; AUC, area under the ROC curve.

**Table S4. Evaluating Model Performance via Area Under the ROC Curve, Calibration Plots, Hosmer-Lemeshow Test, and Brier Score in the Cross Validation.**

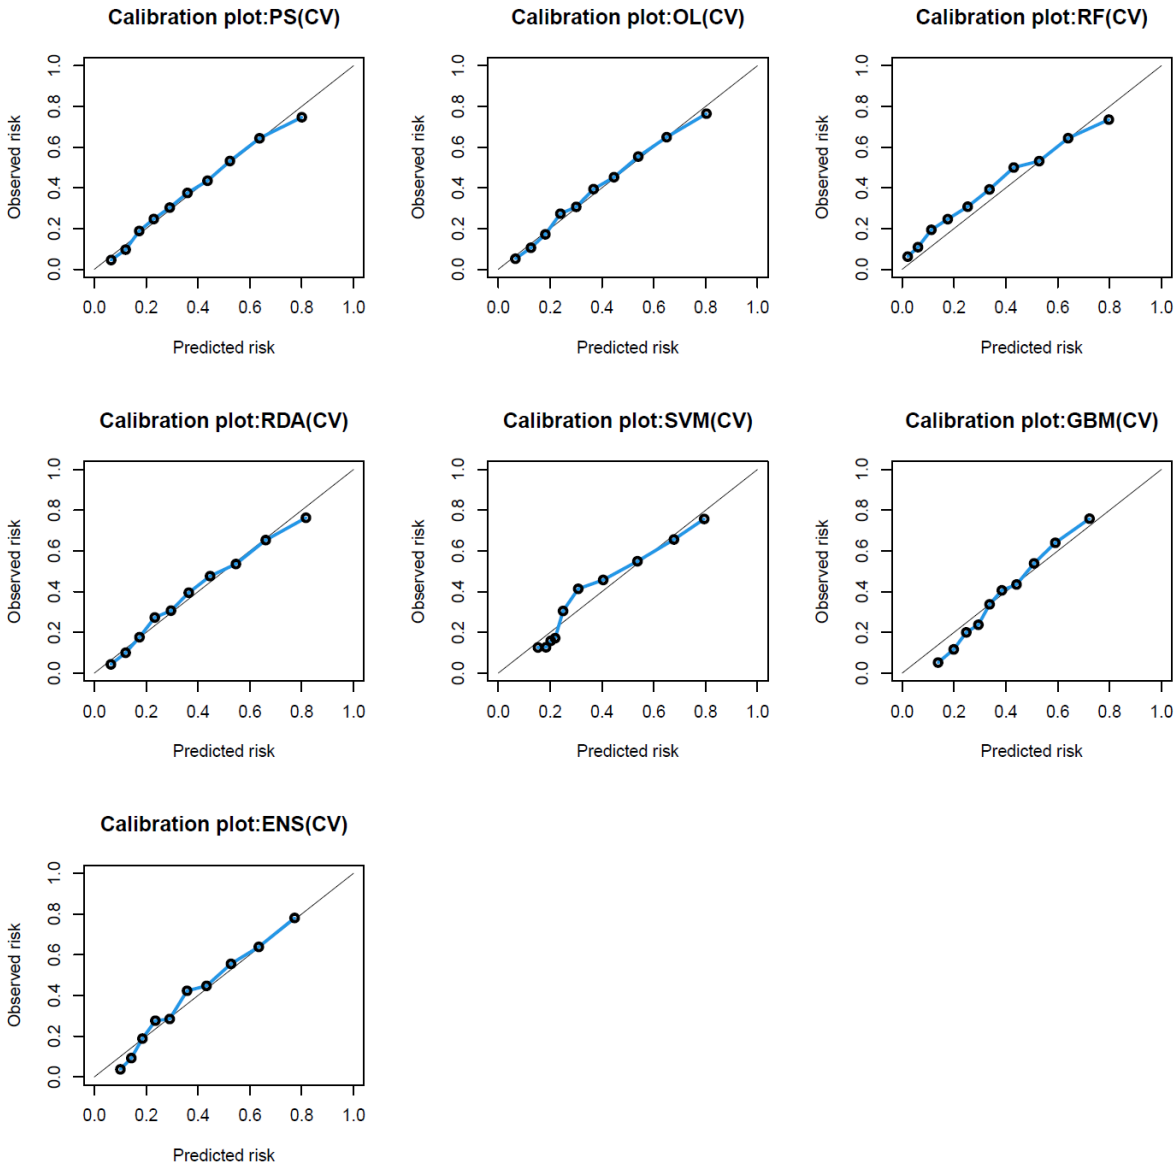

| Method | AUC    | 95% confidence interval | Hosmer-Lemeshow test | Brier Score |
|--------|--------|-------------------------|----------------------|-------------|
| PS     | 0.7722 | 0.747–0.797             | 11.74                | 0.185       |
| OL     | 0.7765 | 0.752–0.802             | 12.89                | 0.184       |
| RF     | 0.7693 | 0.744–0.795             | 50.24                | 0.189       |
| RDA    | 0.7764 | 0.751–0.801             | 14.88                | 0.183       |
| SVM    | 0.7650 | 0.739–0.791             | 1711.55              | 0.189       |
| GBM    | 0.7695 | 0.744–0.795             | 31.13                | 0.188       |
| ENS    | 0.7754 | 0.750–0.800             | 63.91                | 0.182       |

Abbreviations: PS, point system; OL, ordinary logistic regression; RF, random forest; RDA, regularized discriminant analysis; SVM, support vector machine; GBM, gradient-boosting machine; ENS, ensemble method; AUC, area under the ROC curve.

**Table S5. Evaluating Model Performance via Area Under the ROC Curve, Calibration Plots, Hosmer-Lemeshow Test, and Brier Score in the Validation dataset.**

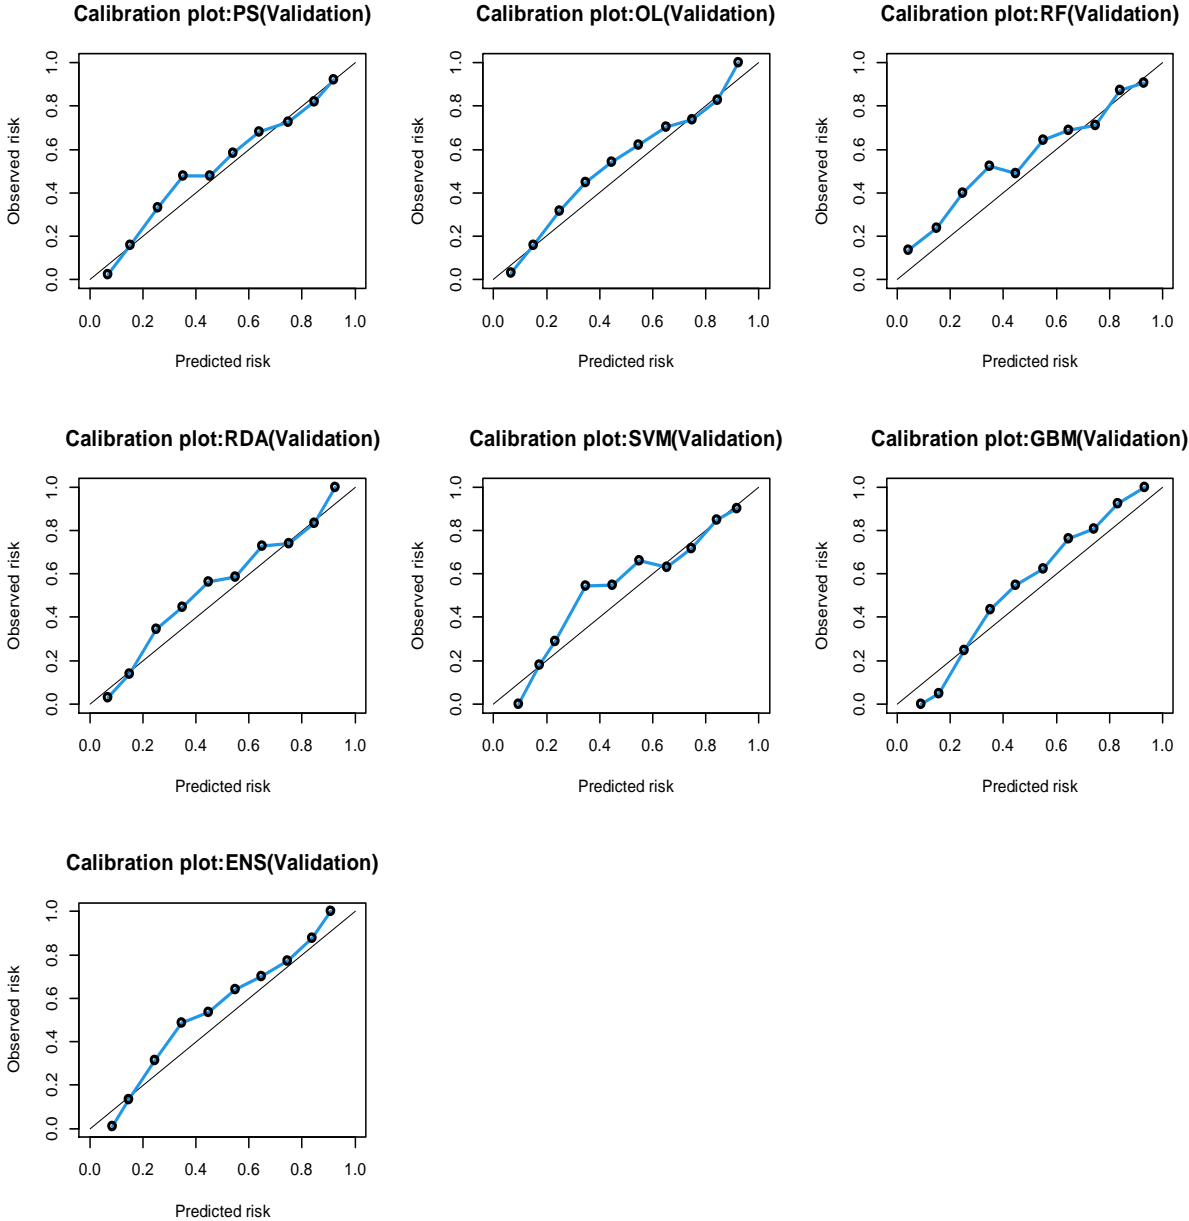



| Method | AUC    | 95% confidence interval | Hosmer-Lemeshow test | Brier Score |
|--------|--------|-------------------------|----------------------|-------------|
| PS     | 0.7717 | 0.752–0.792             | 41.7                 | 0.195       |
| OL     | 0.7790 | 0.759–0.799             | 42.8                 | 0.193       |
| RF     | 0.7652 | 0.745–0.786             | 192.9                | 0.204       |
| RDA    | 0.7779 | 0.758–0.798             | 56.6                 | 0.195       |
| SVM    | 0.7536 | 0.732–0.775             | 67.8                 | 0.206       |
| GBM    | 0.7753 | 0.756–0.795             | 74.0                 | 0.197       |
| ENS    | 0.7807 | 0.761–0.800             | 63.3                 | 0.195       |

Abbreviations: PS, point system; OL, ordinary logistic regression; RF, random forest; RDA, regularized discriminant analysis; SVM, support vector machine; GBM, gradient-boosting machine; ENS, ensemble method; AUC, area under the ROC curve.

**Table S6. Mortality risk according to total point of new sepsis mortality model.**

| Point | Risk  | Point | Risk  | Point | Risk  | Point | Risk  |
|-------|-------|-------|-------|-------|-------|-------|-------|
| 0     | 1.38  | 19    | 12.03 | 38    | 57.21 | 57    | 92.89 |
| 1     | 1.55  | 20    | 13.36 | 39    | 60.12 | 58    | 93.65 |
| 2     | 1.75  | 21    | 14.81 | 40    | 62.96 | 59    | 94.32 |
| 3     | 1.97  | 22    | 16.39 | 41    | 65.71 | 60    | 94.93 |
| 4     | 2.21  | 23    | 18.10 | 42    | 68.36 | 61    | 95.48 |
| 5     | 2.49  | 24    | 19.95 | 43    | 70.90 | 62    | 95.97 |
| 6     | 2.79  | 25    | 21.93 | 44    | 73.31 | 63    | 96.41 |
| 7     | 3.14  | 26    | 24.06 | 45    | 75.59 | 64    | 96.80 |
| 8     | 3.52  | 27    | 26.32 | 46    | 77.74 | 65    | 97.15 |
| 9     | 3.96  | 28    | 28.71 | 47    | 79.75 | 66    | 97.47 |
| 10    | 4.44  | 29    | 31.23 | 48    | 81.62 | 67    | 97.75 |
| 11    | 4.98  | 30    | 33.86 | 49    | 83.35 | 68    | 98.00 |
| 12    | 5.57  | 31    | 36.60 | 50    | 84.95 | 69    | 98.22 |
| 13    | 6.24  | 32    | 39.42 | 51    | 86.42 | 70    | 98.42 |
| 14    | 6.98  | 33    | 42.32 | 52    | 87.77 | 71    | 98.59 |
| 15    | 7.80  | 34    | 45.28 | 53    | 89.00 | 72    | 98.75 |
| 16    | 8.71  | 35    | 48.26 | 54    | 90.12 | 73    | 98.89 |
| 17    | 9.71  | 36    | 51.26 | 55    | 91.14 |       |       |
| 18    | 10.82 | 37    | 54.25 | 56    | 92.06 |       |       |

**Table S7. IRB numbers in the derivation dataset (KSA 3)**

| Number | Institution                                  | IRB number      |
|--------|----------------------------------------------|-----------------|
| 1      | Asan Medical Center                          | 2018-0675       |
| 2      | Chonnam National University Hospital         | CNUH2029075     |
| 3      | Chungnam National University Hospital        | 2019-11-048-001 |
| 4      | Chungnam National University Sejong Hospital | 2020-08-017     |
| 5      | Daegu Catholic University Medical Center     | CR-18-163-L     |
| 6      | Hallym University Sacred Heart Hospital      | 2018-09-004     |
| 7      | Hanyang University Guri Hospital             | 2020-08-015     |
| 8      | Inje University Sanggye Paik Hospital        | 2018-08-014     |
| 9      | Jeju National University Hospital            | 2018-06-012     |
| 10     | Jeonbuk National University Hospital         | CUH-2018-10-027 |
| 11     | Kangwon National University Hospital         | 2018-08-004-001 |
| 12     | Korea University Anam Hospital               | 2019AN0027      |
| 13     | Pusan National University Yangsan Hospital   | 05-2019-092     |
| 14     | Samsung Medical Center                       | 2018-05-108     |
| 15     | Seoul National University Bundang Hospital   | B-1810-500-402  |
| 16     | Seoul National University Hospital           | H-1808-135-967  |
| 17     | Severance Hospital                           | 4-2020-0706     |
| 18     | Ulsan University Hospital                    | UUH2018-08-003  |
| 19     | Yeungnam University Medical Center           | 2020-08-051     |
| 20     | Inje University Ilsan Paik Hospital          | 2021-08-003     |

Abbreviations: IRB, institutional review board; KSA, Korean Sepsis Alliance.

**Table S8. IRB numbers in the validation dataset (KSA 4)**

| Number | Institution                                  | IRB number      |
|--------|----------------------------------------------|-----------------|
| 1      | Seoul National University Bundang Hospital   | B-1810-500-402  |
| 2      | Samsung Medical Center                       | 2018-05-108     |
| 3      | Asan Medical Center                          | 2018-0675       |
| 4      | Inje University Sanggye Paik Hospital        | 2018-08-014     |
| 5      | Seoul National University Hospital           | H-1808-135-967  |
| 6      | Hallym University Sacred Heart Hospital      | 2018-09-004     |
| 7      | Hanyang University Guri Hospital             | 2020-08-015     |
| 8      | Inje University Ilsan Paik Hospital          | 2021-08-003     |
| 9      | Kangwon National University Hospital         | 2018-08-004-001 |
| 10     | Chungnam National University Hospital        | 2019-11-048-001 |
| 11     | Chungnam National University Sejong Hospital | 2020-08-017     |
| 12     | Jeonbuk National University Hospital         | CUH-2018-10-027 |
| 13     | Chonnam National University Hospital         | CNUH2029075     |
| 14     | Pusan National University Yangsan Hospital   | 05-2019-092     |
| 15     | Jeju National University Hospital            | 2018-06-012     |

Abbreviations: IRB, institutional review board; KSA, Korean Sepsis Alliance.
